# Supplementary material
Source: PubMed Central journal article supplement (PMC4506755)
Supplement: NIHMS705555-supplement-SupplementalTable1.pdf [file NIHMS705555-supplement-SupplementalTable1.pdf]

Supplementary Table. Protein names, accession numbers and spectral counts of those proteins identified in this study

S: semi-tryptic; TCA: trichloroacetic acid; UC: ultracentrifugation

| Protein name                                                     | UniProt AC | UniProt ID  | Average spectral counts |       |     | Spectral Counts |      |      |      |      |      |      |        |        |        |        |        |        |     |     |     |     |     |     |       |       |       |       |       |       |   |
|------------------------------------------------------------------|------------|-------------|-------------------------|-------|-----|-----------------|------|------|------|------|------|------|--------|--------|--------|--------|--------|--------|-----|-----|-----|-----|-----|-----|-------|-------|-------|-------|-------|-------|---|
|                                                                  |            |             | TCA                     | TCA-S | UC  | UC-S            | TCA1 | TCA2 | TCA3 | TCA4 | TCA5 | TCA6 | TCA-S1 | TCA-S2 | TCA-S3 | TCA-S4 | TCA-S5 | TCA-S6 | UC1 | UC2 | UC3 | UC4 | UC5 | UC6 | UC-S1 | UC-S2 | UC-S3 | UC-S4 | UC-S5 | UC-S6 |   |
| Acid sphingomyelinase-like phosphodiesterase 3b                  | Q92485     | ASM3B_HUMAN | 0                       | 0     | 4   | 4               | 0    | 0    | 0    | 0    | 0    | 0    | 0      | 0      | 0      | 0      | 0      | 0      | 10  | 5   | 5   | 0   | 5   | 0   | 8     | 5     | 5     | 0     | 4     | 0     |   |
| Alkaline phosphatase, tissue-nonspecific isozyme                 | P05186     | PPBT_HUMAN  | 0                       | 0     | 2   | 2               | 0    | 0    | 0    | 0    | 2    | 0    | 0      | 0      | 0      | 2      | 0      | 0      | 0   | 0   | 0   | 0   | 0   | 11  | 0     | 0     | 0     | 0     | 0     | 9     |   |
| Annexin A11                                                      | P50995     | ANX11_HUMAN | 1                       | 0     | 1   | 2               | 0    | 0    | 0    | 0    | 5    | 0    | 0      | 0      | 0      | 2      | 0      | 0      | 0   | 0   | 0   | 0   | 5   | 3   | 4     | 0     | 0     | 0     | 4     | 3     |   |
| Calmodulin-like protein 3                                        | P27482     | CALL3_HUMAN | 0                       | 0     | 1   | 1               | 0    | 0    | 0    | 0    | 1    | 1    | 0      | 0      | 0      | 1      | 1      | 0      | 0   | 0   | 0   | 7   | 0   | 0   | 0     | 0     | 0     | 5     | 0     | 0     |   |
| Cathepsin G                                                      | P08311     | CATG_HUMAN  | 0                       | 1     | 6   | 4               | 0    | 0    | 0    | 0    | 2    | 0    | 0      | 0      | 0      | 0      | 3      | 10     | 0   | 0   | 0   | 0   | 25  | 8   | 0     | 0     | 0     | 0     | 18    |       |   |
| Complement component C9                                          | P02748     | CO9_HUMAN   | 0                       | 1     | 1   | 1               | 0    | 0    | 0    | 0    | 0    | 0    | 1      | 1      | 1      | 1      | 1      | 1      | 0   | 0   | 0   | 0   | 8   | 0   | 0     | 0     | 0     | 0     | 6     |       |   |
| C-reactive protein                                               | P02741     | CRP_HUMAN   | 0                       | 0     | 2   | 1               | 0    | 0    | 0    | 0    | 0    | 0    | 0      | 0      | 0      | 0      | 0      | 10     | 0   | 0   | 0   | 0   | 0   | 8   | 0     | 0     | 0     | 0     | 0     |       |   |
| Ectonucleotide pyrophosphatase/phosphodiesterase family member 7 | Q6UWV6     | ENPP7_HUMAN | 0                       | 0     | 3   | 3               | 2    | 0    | 0    | 0    | 0    | 2    | 0      | 0      | 0      | 0      | 0      | 0      | 5   | 5   | 0   | 0   | 5   | 3   | 4     | 5     | 0     | 0     | 4     | 3     |   |
| Eosinophil peroxidase                                            | P11678     | PERE_HUMAN  | 0                       | 0     | 9   | 8               | 0    | 1    | 0    | 0    | 0    | 1    | 0      | 1      | 0      | 0      | 0      | 1      | 34  | 0   | 0   | 0   | 15  | 3   | 29    | 0     | 0     | 0     | 16    | 3     |   |
| Ferritin heavy chain                                             | P02794     | FRIH_HUMAN  | 0                       | 0     | 6   | 5               | 1    | 0    | 1    | 0    | 0    | 0    | 0      | 0      | 1      | 0      | 0      | 0      | 5   | 27  | 5   | 0   | 0   | 0   | 0     | 22    | 5     | 0     | 0     | 0     |   |
| Histone H2B type 1-K                                             | O60814     | H2BK_HUMAN  | 0                       | 0     | 1   | 2               | 0    | 0    | 0    | 0    | 2    | 0    | 0      | 0      | 0      | 0      | 1      | 0      | 0   | 5   | 0   | 0   | 0   | 0   | 0     | 9     | 0     | 0     | 0     | 0     |   |
| Isoform 1 of Plakophilin-1                                       | Q13835-2   | PKP1_HUMAN  | 0                       | 0     | 1   | 1               | 0    | 0    | 0    | 0    | 2    | 0    | 0      | 0      | 0      | 2      | 0      | 0      | 0   | 0   | 0   | 5   | 0   | 0   | 0     | 0     | 0     | 4     | 0     | 0     |   |
| Mucin-1                                                          | P15941     | MUC1_HUMAN  | 0                       | 0     | 5   | 4               | 0    | 0    | 0    | 0    | 0    | 1    | 0      | 0      | 0      | 0      | 0      | 2      | 0   | 0   | 18  | 0   | 0   | 11  | 0     | 0     | 16    | 0     | 0     | 9     |   |
| Pyruvate kinase isozymes M1/M2                                   | P14618     | KPYM_HUMAN  | 0                       | 1     | 1   | 1               | 0    | 0    | 0    | 0    | 2    | 0    | 0      | 0      | 1      | 0      | 1      | 5      | 0   | 0   | 0   | 7   | 0   | 0   | 0     | 0     | 0     | 5     | 0     | 0     |   |
| WD repeat-containing protein 67                                  | Q96DN5     | WDR67_HUMAN | 0                       | 0     | 0   | 2               | 0    | 0    | 0    | 1    | 0    | 0    | 0      | 0      | 0      | 1      | 0      | 0      | 0   | 0   | 0   | 0   | 0   | 0   | 9     | 5     | 0     | 0     | 0     | 0     |   |
| Zinc finger protein 337                                          | Q9Y3M9     | ZN337_HUMAN | 0                       | 0     | 0   | 2               | 0    | 0    | 0    | 0    | 0    | 0    | 0      | 0      | 0      | 0      | 0      | 1      | 0   | 0   | 0   | 0   | 0   | 0   | 0     | 0     | 0     | 12    | 0     | 0     |   |
| 10 kDa heat shock protein, mitochondrial                         | P61604     | CH10_HUMAN  | 3                       | 3     | 0   | 0               | 1    | 1    | 1    | 5    | 5    | 2    | 1      | 1      | 1      | 5      | 5      | 2      | 0   | 0   | 0   | 0   | 0   | 0   | 0     | 0     | 0     | 0     | 0     | 0     |   |
| 14-3-3 protein epsilon                                           | P62258     | 1433E_HUMAN | 3                       | 2     | 1   | 1               | 0    | 1    | 9    | 0    | 5    | 0    | 0      | 1      | 7      | 0      | 5      | 0      | 0   | 0   | 0   | 7   | 0   | 0   | 0     | 0     | 0     | 5     | 0     | 0     |   |
| 14-3-3 protein gamma                                             | P61981     | 1433G_HUMAN | 2                       | 1     | 1   | 1               | 0    | 1    | 2    | 0    | 6    | 0    | 0      | 1      | 2      | 0      | 5      | 0      | 0   | 0   | 0   | 7   | 0   | 0   | 0     | 0     | 0     | 5     | 0     | 0     |   |
| 14-3-3 protein zeta/delta                                        | P63104     | 1433Z_HUMAN | 4                       | 4     | 2   | 2               | 0    | 3    | 11   | 0    | 12   | 0    | 0      | 3      | 11     | 0      | 10     | 0      | 0   | 0   | 14  | 0   | 0   | 0   | 0     | 0     | 0     | 12    | 0     | 0     |   |
| 2,4-dienoyl-CoA reductase, mitochondrial                         | Q16698     | DECR_HUMAN  | 3                       | 3     | 0   | 0               | 0    | 5    | 7    | 0    | 4    | 0    | 0      | 6      | 8      | 0      | 5      | 0      | 0   | 0   | 0   | 0   | 0   | 0   | 0     | 0     | 0     | 0     | 0     | 0     |   |
| 2-oxoglutarate dehydrogenase, mitochondrial                      | Q02218     | ODO1_HUMAN  | 1                       | 1     | 0   | 0               | 0    | 1    | 2    | 0    | 0    | 0    | 0      | 1      | 2      | 0      | 2      | 0      | 0   | 0   | 0   | 0   | 0   | 0   | 0     | 0     | 0     | 0     | 0     | 0     |   |
| 3-hydroxybutyrate dehydrogenase type 2                           | Q98UT1     | BDH2_HUMAN  | 2                       | 2     | 0   | 0               | 2    | 2    | 3    | 1    | 6    | 0    | 2      | 2      | 3      | 1      | 5      | 0      | 0   | 0   | 0   | 0   | 0   | 0   | 0     | 0     | 0     | 0     | 0     | 0     |   |
| 3-ketoacyl-CoA thiolase, mitochondrial                           | P42765     | THIM_HUMAN  | 2                       | 3     | 0   | 0               | 0    | 2    | 10   | 0    | 2    | 0    | 0      | 3      | 10     | 0      | 3      | 0      | 0   | 0   | 0   | 0   | 0   | 0   | 0     | 0     | 0     | 0     | 0     | 0     | 0 |
| 40S ribosomal protein S15a                                       | P62244     | RS15A_HUMAN | 0                       | 0     | 0   | 0               | 0    | 0    | 0    | 0    | 1    | 0    | 0      | 0      | 0      | 0      | 1      | 0      | 0   | 0   | 0   | 0   | 0   | 0   | 0     | 0     | 0     | 0     | 0     | 0     | 0 |
| 40S ribosomal protein S7                                         | P62081     | RS7_HUMAN   | 0                       | 0     | 0   | 0               | 0    | 0    | 0    | 0    | 1    | 0    | 0      | 0      | 0      | 0      | 1      | 0      | 0   | 0   | 0   | 0   | 0   | 0   | 0     | 0     | 0     | 0     | 0     | 0     | 0 |
| 4-aminobutyrate aminotransferase, mitochondrial                  | P80404     | GABT_HUMAN  | 1                       | 1     | 0   | 0               | 1    | 1    | 2    | 1    | 2    | 0    | 1      | 1      | 2      | 1      | 2      | 0      | 0   | 0   | 0   | 0   | 0   | 0   | 0     | 0     | 0     | 0     | 0     | 0     | 0 |
| 55 kDa erythrocyte membrane protein                              | Q00013     | EM55_HUMAN  | 1                       | 1     | 0   | 0               | 0    | 1    | 2    | 0    | 0    | 0    | 0      | 1      | 2      | 0      | 0      | 0      | 0   | 0   | 0   | 0   | 0   | 0   | 0     | 0     | 0     | 0     | 0     | 0     | 0 |
| 5'-nucleotidase                                                  | P21589     | 5NTD_HUMAN  | 1                       | 1     | 0   | 0               | 0    | 0    | 0    | 0    | 0    | 8    | 0      | 0      | 0      | 0      | 0      | 8      | 0   | 0   | 0   | 0   | 0   | 0   | 0     | 0     | 0     | 0     | 0     | 0     | 0 |
| 60S acidic ribosomal protein P0                                  | P05388     | RLA0_HUMAN  | 0                       | 0     | 0   | 0               | 0    | 0    | 0    | 0    | 1    | 0    | 0      | 0      | 0      | 0      | 1      | 0      | 0   | 0   | 0   | 0   | 0   | 0   | 0     | 0     | 0     | 0     | 0     | 0     | 0 |
| 60S acidic ribosomal protein P2                                  | P05387     | RLA2_HUMAN  | 1                       | 1     | 0   | 0               | 0    | 1    | 2    | 1    | 1    | 1    | 0      | 2      | 2      | 1      | 1      | 0      | 0   | 0   | 0   | 0   | 0   | 0   | 0     | 0     | 0     | 0     | 0     | 0     | 0 |
| 6-phosphogluconate dehydrogenase, decarboxylating                | P52209     | 6PGD_HUMAN  | 1                       | 1     | 0   | 0               | 0    | 0    | 4    | 0    | 0    | 0    | 0      | 0      | 0      | 3      | 0      | 0      | 0   | 0   | 0   | 0   | 0   | 0   | 0     | 0     | 0     | 0     | 0     | 0     | 0 |
| 78 kDa glucose-regulated protein                                 | P11021     | GRP78_HUMAN | 7                       | 6     | 1   | 0               | 2    | 7    | 15   | 5    | 8    | 3    | 2      | 4      | 13     | 5      | 7      | 3      | 0   | 0   | 0   | 7   | 0   | 0   | 0     | 0     | 0     | 0     | 0     | 0     | 0 |
| Acetyl-CoA acetyltransferase, mitochondrial                      | P24752     | THIL_HUMAN  | 1                       | 1     | 0   | 0               | 0    | 0    | 4    | 0    | 2    | 0    | 0      | 0      | 4      | 0      | 2      | 0      | 0   | 0   | 0   | 0   | 0   | 0   | 0     | 0     | 0     | 0     | 0     | 0     | 0 |
| Acid ceramidase                                                  | Q13510     | ASAH1_HUMAN | 0                       | 0     | 0   | 0               | 0    | 0    | 0    | 0    | 0    | 2    | 0      | 0      | 0      | 0      | 0      | 1      | 0   | 0   | 0   | 0   | 0   | 0   | 0     | 0     | 0     | 0     | 0     | 0     | 0 |
| Aconitate hydratase, mitochondrial                               | Q99798     | ACON_HUMAN  | 2                       | 2     | 0   | 0               | 0    | 0    | 10   | 0    | 2    | 0    | 0      | 0      | 8      | 0      | 2      | 0      | 0   | 0   | 0   | 0   | 0   | 0   | 0     | 0     | 0     | 0     | 0     | 0     | 0 |
| Actin, cytoplasmic 1                                             | P60709     | ACTB_HUMAN  | 15                      | 14    | 4   | 3               | 1    | 11   | 21   | 11   | 26   | 17   | 1      | 9      | 21     | 8      | 26     | 17     | 0   | 0   | 0   | 21  | 0   | 0   | 0     | 0     | 0     | 17    | 0     | 0     |   |
| Actin-related protein 2/3 complex subunit 4                      | P59998     | ARPC4_HUMAN | 0                       | 0     | 0   | 0               | 0    | 0    | 1    | 0    | 0    | 0    | 0      | 1      | 0      | 0      | 0      | 0      | 0   | 0   | 0   | 0   | 0   | 0   | 0     | 0     | 0     | 0     | 0     | 0     | 0 |
| Actin-related protein 3                                          | P61158     | ARP3_HUMAN  | 0                       | 0     | 0   | 0               | 0    | 0    | 0    | 0    | 1    | 0    | 0      | 0      | 0      | 0      | 1      | 0      | 0   | 0   | 0   | 0   | 0   | 0   | 0     | 0     | 0     | 0     | 0     | 0     | 0 |
| Adenosine deaminase                                              | P00813     | ADA_HUMAN   | 12                      | 11    | 0   | 0               | 18   | 8    | 10   | 16   | 15   | 7    | 17     | 5      | 9      | 14     | 13     | 5      | 0   | 0   | 0   | 0   | 0   | 0   | 0     | 0     | 0     | 0     | 0     | 0     | 0 |
| Adenylyl cyclase-associated protein 1                            | Q01518     | CAP1_HUMAN  | 5                       | 4     | 0   | 0               | 8    | 4    | 5    | 5    | 2    | 6    | 4      | 2      | 5      | 5      | 2      | 0      | 0   | 0   | 0   | 0   | 0   | 0   | 0     | 0     | 0     | 0     | 0     | 0     | 0 |
| Adseverin                                                        | Q9Y6U3     | ADSV_HUMAN  | 1                       | 1     | 0   | 0               | 0    | 1    | 0    | 1    | 1    | 1    | 0      | 1      | 0      | 1      | 1      | 0      | 0   | 0   | 0   | 0   | 0   | 0   | 0     | 0     | 0     | 0     | 0     | 0     | 0 |
| Afamin                                                           | P43652     | AFAM_HUMAN  | 1                       | 1     | 0   | 0               | 0    | 1    | 6    | 0    | 1    | 0    | 0      | 0      | 4      | 0      | 1      | 0      | 0   | 0   | 0   | 0   | 0   | 0   | 0     | 0     | 0     | 0     | 0     | 0     | 0 |
| Aflatoxin B1 aldehyde reductase member 3                         | O95154     | ARK73_HUMAN | 0                       | 0     | 0   | 0               | 0    | 0    | 0    | 0    | 0    | 0    | 0      | 0      | 0      | 0      | 1      | 0      | 0   | 0   | 0   | 0   | 0   | 0   | 0     | 0     | 0     | 0     | 0     | 0     | 0 |
| Alcohol dehydrogenase [NADP+]                                    | P14550     | AK1A1_HUMAN | 8                       | 9     | 0   | 0               | 6    | 8    | 9    | 14   | 12   | 0    | 5      | 12     | 8      | 17     | 10     | 0      | 0   | 0   | 0   | 0   | 0   | 0   | 0     | 0     | 0     | 0     | 0     | 0     | 0 |
| Alcohol dehydrogenase 1C                                         | P00326     | ADH1G_HUMAN | 7                       | 7     | 0   | 0               | 11   | 8    | 10   | 2    | 12   | 0    | 10     | 8      | 9      | 2      | 12     | 0      | 0   | 0   | 0   | 0   | 0   | 0   | 0     | 0     | 0     | 0     | 0     | 0     | 0 |
| Aldehyde dehydrogenase, dimeric NADP-preferring                  | P30838     | AL3A1_HUMAN | 0                       | 0     | 0   | 0               | 1    | 0    | 0    | 0    | 0    | 0    | 1      | 0      | 0      | 0      | 0      | 1      | 0   | 0   | 0   | 0   | 0   | 0   | 0     | 0     | 0     | 0     | 0     | 0     | 0 |
| Aldehyde dehydrogenase, mitochondrial                            | P05091     | ALDH2_HUMAN | 1                       | 1     | 1   | 1               | 1    | 1    | 2    | 0    | 2    | 0    | 1      | 1      | 2      | 0      | 2      | 0      | 0   | 0   | 0   | 5   | 3   | 0   | 0     | 0     | 0     | 0     | 4     | 3     |   |
| Aldo-keto reductase family 1 member B10                          | O60218     | AK1BA_HUMAN | 24                      | 25    | 0   | 0               | 25   | 22   | 25   | 26   | 28   | 18   | 24     | 25     | 26     | 25     | 30     | 18     | 0   | 0   | 0   | 0   | 0   | 0   | 0     | 0     | 0     | 0     | 0     | 0     | 0 |
| Aldo-keto reductase family 1 member C1                           | Q04828     | AK1C1_HUMAN | 4                       | 6     | 0   | 0               | 4    | 3    | 4    | 4    | 5    | 1    | 6      | 6      | 7      | 5      | 7      | 2      | 0   | 0   | 0   | 0   | 0   | 0   | 0     | 0     | 0     | 0     | 0     | 0     | 0 |
| Aldo-keto reductase family 1 member C3                           | P42330     | AK1C3_HUMAN | 5                       | 6     | 0   | 0               | 5    | 8    | 6    | 4    | 6    | 1    | 5      | 10     | 7      | 5      | 7      | 2      | 0   | 0   | 0   | 0   | 0   | 0   | 0     | 0     | 0     | 0     | 0     | 0     | 0 |
| Aldose 1-epimerase                                               | Q96C23     | GALM_HUMAN  | 3                       | 2     | 1   | 1               | 4    | 3    | 2    | 4    | 2    | 1    | 3      | 3      | 2      | 4      | 1      | 1      | 0   | 0   | 0   | 0   | 5   | 0   | 0     | 0     | 0     | 4     | 0     | 0     |   |
| Alpha-1-acid glycoprotein 1                                      | P02763     | A1AG1_HUMAN | 23                      | 22    | 18  | 16              | 14   | 15   | 17   | 20   | 27   | 44   | 12     | 15     | 16     | 18     | 27     | 41     | 5   | 5   | 30  | 0   | 24  | 46  | 8     | 5     | 21    | 0     | 21    | 39    |   |
| Alpha-1-acid glycoprotein 2                                      | P19652     | A1AG2_HUMAN | 9                       | 9     | 11  | 10              | 4    | 10   | 10   | 6    | 9    | 17   | 3      | 9      | 8      | 6      | 8      | 18     | 5   | 5   | 24  | 0   | 20  | 14  | 8     | 5     | 16    | 0     | 16    | 15    |   |
| Alpha-1-antichymotrypsin                                         | P01011     | AAC1_HUMAN  | 13                      | 12    | 1   | 1               | 7    | 11   | 10   | 17   | 9    | 22   | 8      | 10     | 9      | 15     | 9      | 19     | 0   | 0   | 0   | 0   | 3   | 0   | 0     | 0     | 0     | 0     | 0     | 3     | 0 |
| Alpha-1-antitrypsin                                              | P01009     | A1AT_HUMAN  | 731                     | 708   | 659 | 707             | 91   | 156  | 138  | 116  | 158  | 72   | 84     | 158    | 133    | 112    | 152    | 69     | 110 | 78  | 114 | 183 | 131 | 43  | 119   | 90    | 142   | 182   | 129   | 45    |   |
| Alpha-                                                           |            |             |                         |       |     |                 |      |      |      |      |      |      |        |        |        |        |        |        |     |     |     |     |     |     |       |       |       |       |       |       |   |



|                                                                                |         |             |    |    |    |    |    |    |    |    |    |    |    |    |    |    |    |    |    |    |    |     |    |    |    |    |    |    |    |    |
|--------------------------------------------------------------------------------|---------|-------------|----|----|----|----|----|----|----|----|----|----|----|----|----|----|----|----|----|----|----|-----|----|----|----|----|----|----|----|----|
| Cystatin-S                                                                     | P01036  | CYTS_HUMAN  | 4  | 3  | 1  | 1  | 0  | 0  | 0  | 0  | 0  | 22 | 0  | 0  | 0  | 0  | 20 | 0  | 0  | 0  | 0  | 0   | 3  | 0  | 0  | 0  | 0  | 0  | 3  |    |
| Cystatin-SA                                                                    | P09228  | CYTT_HUMAN  | 2  | 2  | 0  | 0  | 0  | 0  | 0  | 0  | 13 | 0  | 0  | 0  | 0  | 0  | 11 | 0  | 0  | 0  | 0  | 0   | 0  | 0  | 0  | 0  | 0  | 0  | 0  |    |
| Cystatin-SN                                                                    | P01037  | CYTN_HUMAN  | 2  | 2  | 0  | 0  | 0  | 0  | 0  | 0  | 13 | 0  | 0  | 0  | 0  | 0  | 13 | 0  | 0  | 0  | 0  | 0   | 0  | 0  | 0  | 0  | 0  | 0  | 0  |    |
| Cysteine-rich secretory protein 3                                              | P54108  | CRIS3_HUMAN | 1  | 1  | 0  | 0  | 0  | 0  | 0  | 0  | 5  | 7  | 0  | 0  | 0  | 0  | 7  | 0  | 0  | 0  | 0  | 0   | 0  | 0  | 0  | 0  | 0  | 0  | 0  |    |
| Cytochrome c                                                                   | P99999  | CYC_HUMAN   | 6  | 5  | 1  | 1  | 7  | 3  | 6  | 7  | 11 | 2  | 7  | 2  | 4  | 7  | 9  | 2  | 5  | 0  | 0  | 0   | 0  | 4  | 0  | 0  | 0  | 0  | 0  |    |
| Cytochrome c oxidase subunit 2                                                 | P00403  | COX2_HUMAN  | 2  | 2  | 0  | 0  | 1  | 0  | 1  | 6  | 1  | 2  | 0  | 1  | 7  | 2  | 2  | 0  | 0  | 0  | 0  | 0   | 0  | 0  | 0  | 0  | 0  | 0  | 0  |    |
| Cytochrome c oxidase subunit 4 isoform 1, mitochondrial                        | P13073  | COX4I_HUMAN | 1  | 1  | 0  | 0  | 0  | 0  | 0  | 2  | 2  | 2  | 0  | 0  | 0  | 2  | 2  | 2  | 0  | 0  | 0  | 0   | 0  | 0  | 0  | 0  | 0  | 0  | 0  |    |
| Cytochrome c oxidase subunit 5A, mitochondrial                                 | P20674  | COX5A_HUMAN | 1  | 2  | 0  | 0  | 0  | 0  | 0  | 1  | 4  | 1  | 0  | 0  | 0  | 4  | 5  | 2  | 0  | 0  | 0  | 0   | 0  | 0  | 0  | 0  | 0  | 0  | 0  |    |
| Cytochrome c oxidase subunit 5B, mitochondrial                                 | P10606  | COX5B_HUMAN | 0  | 0  | 0  | 0  | 0  | 0  | 0  | 1  | 1  | 0  | 0  | 0  | 0  | 2  | 0  | 0  | 0  | 0  | 0  | 0   | 0  | 0  | 0  | 0  | 0  | 0  | 0  |    |
| Cytochrome c oxidase subunit 6C                                                | P09669  | COX6C_HUMAN | 1  | 1  | 0  | 0  | 0  | 1  | 0  | 2  | 2  | 1  | 0  | 1  | 0  | 2  | 3  | 1  | 0  | 0  | 0  | 0   | 0  | 0  | 0  | 0  | 0  | 0  | 0  |    |
| Cytochrome c oxidase subunit 7A2, mitochondrial                                | P14406  | CX7A2_HUMAN | 2  | 2  | 0  | 0  | 2  | 1  | 2  | 4  | 2  | 5  | 1  | 2  | 1  | 2  | 2  | 5  | 0  | 0  | 0  | 0   | 0  | 0  | 0  | 0  | 0  | 0  | 0  |    |
| Cytoplasmic aconitase hydratase                                                | P21399  | ACOC_HUMAN  | 1  | 1  | 0  | 0  | 0  | 1  | 4  | 0  | 0  | 0  | 0  | 1  | 3  | 0  | 0  | 0  | 0  | 0  | 0  | 0   | 0  | 0  | 0  | 0  | 0  | 0  | 0  |    |
| Cytosolic non-specific dipeptidase                                             | Q96KP4  | CNDP2_HUMAN | 4  | 4  | 1  | 1  | 0  | 8  | 6  | 1  | 6  | 1  | 0  | 8  | 7  | 1  | 6  | 2  | 0  | 0  | 0  | 0   | 5  | 0  | 0  | 0  | 0  | 4  | 0  |    |
| D-dopachrome decarboxylase                                                     | P30046  | DOPD_HUMAN  | 4  | 3  | 0  | 0  | 0  | 7  | 9  | 1  | 6  | 2  | 0  | 5  | 8  | 0  | 5  | 1  | 0  | 0  | 0  | 0   | 0  | 0  | 0  | 0  | 0  | 0  | 0  |    |
| Defensin-5                                                                     | Q01523  | DEF5_HUMAN  | 6  | 5  | 0  | 0  | 3  | 2  | 2  | 4  | 8  | 16 | 3  | 2  | 1  | 4  | 7  | 15 | 0  | 0  | 0  | 0   | 0  | 0  | 0  | 0  | 0  | 0  | 0  |    |
| Defensin-6                                                                     | Q01524  | DEF6_HUMAN  | 1  | 0  | 0  | 0  | 0  | 0  | 0  | 0  | 1  | 2  | 0  | 0  | 0  | 0  | 1  | 1  | 0  | 0  | 0  | 0   | 0  | 0  | 0  | 0  | 0  | 0  | 0  |    |
| Dehydrogenase/reductase SDR family member 11                                   | Q6UWPP2 | DHR11_HUMAN | 3  | 3  | 0  | 0  | 1  | 5  | 6  | 2  | 4  | 1  | 1  | 6  | 4  | 4  | 3  | 1  | 0  | 0  | 0  | 0   | 0  | 0  | 0  | 0  | 0  | 0  | 0  |    |
| Deoxyribonuclease-1                                                            | P24855  | DNAS1_HUMAN | 3  | 3  | 0  | 0  | 3  | 0  | 0  | 1  | 6  | 2  | 5  | 2  | 0  | 1  | 6  | 2  | 5  | 0  | 0  | 0   | 0  | 0  | 0  | 0  | 0  | 0  | 0  |    |
| Dermcidin                                                                      | P81605  | DCD_HUMAN   | 8  | 7  | 12 | 10 | 9  | 8  | 6  | 11 | 8  | 5  | 8  | 8  | 4  | 9  | 7  | 5  | 10 | 5  | 12 | 21  | 15 | 11 | 8  | 5  | 11 | 17 | 12 | 9  |
| Desmoglein-1                                                                   | Q02413  | DSG1_HUMAN  | 1  | 1  | 5  | 5  | 0  | 0  | 1  | 1  | 2  | 2  | 0  | 0  | 1  | 0  | 2  | 1  | 0  | 0  | 5  | 14  | 9  | 0  | 0  | 5  | 17 | 8  | 0  |    |
| Desmoplakin                                                                    | P15924  | DESP_HUMAN  | 5  | 5  | 4  | 3  | 0  | 1  | 0  | 1  | 20 | 6  | 0  | 1  | 1  | 20 | 7  | 0  | 0  | 0  | 7  | 15  | 3  | 0  | 0  | 0  | 5  | 12 | 3  |    |
| Dihydrodipolyl dehydrogenase, mitochondrial                                    | P09622  | DLDH_HUMAN  | 2  | 2  | 0  | 0  | 2  | 1  | 3  | 1  | 2  | 0  | 2  | 1  | 3  | 1  | 2  | 0  | 0  | 0  | 0  | 0   | 0  | 0  | 0  | 0  | 0  | 0  | 0  |    |
| Dihydrodipolyllysine-residue succinyltransferase, 2-oxoglutarate dehydrogenase | P36957  | ODO2_HUMAN  | 2  | 2  | 0  | 0  | 2  | 1  | 1  | 2  | 2  | 1  | 2  | 1  | 1  | 2  | 2  | 1  | 0  | 0  | 0  | 0   | 0  | 0  | 0  | 0  | 0  | 0  | 0  |    |
| Dipeptidyl peptidase 4                                                         | P27487  | DPP4_HUMAN  | 4  | 3  | 4  | 3  | 7  | 1  | 2  | 4  | 5  | 5  | 6  | 1  | 1  | 2  | 3  | 5  | 0  | 0  | 0  | 9   | 14 | 0  | 0  | 0  | 0  | 8  | 12 |    |
| DNA-(apurinic or apyrimidinic site) lyase                                      | P27695  | APEX1_HUMAN | 0  | 0  | 0  | 0  | 0  | 0  | 1  | 0  | 0  | 0  | 0  | 0  | 1  | 0  | 0  | 0  | 0  | 0  | 0  | 0   | 0  | 0  | 0  | 0  | 0  | 0  | 0  |    |
| Dolichyl-diphosphooligosaccharide--protein glycosyltransferase 48 kDa subunit  | P39656  | OST48_HUMAN | 0  | 0  | 0  | 0  | 0  | 1  | 0  | 1  | 0  | 0  | 0  | 1  | 0  | 1  | 0  | 0  | 0  | 0  | 0  | 0   | 0  | 0  | 0  | 0  | 0  | 0  | 0  |    |
| Dynein heavy chain 8, axonemal                                                 | Q96JB1  | DYH8_HUMAN  | 0  | 0  | 0  | 0  | 0  | 0  | 0  | 0  | 0  | 0  | 0  | 0  | 1  | 0  | 1  | 0  | 0  | 0  | 0  | 0   | 0  | 0  | 0  | 0  | 0  | 0  | 0  |    |
| Echinoderm microtubule-associated protein-like 4                               | Q9HC35  | EMAL4_HUMAN | 0  | 0  | 0  | 0  | 0  | 0  | 1  | 0  | 1  | 0  | 0  | 0  | 0  | 0  | 1  | 0  | 0  | 0  | 0  | 0   | 0  | 0  | 0  | 0  | 0  | 0  | 0  |    |
| Elongation factor 1-gamma                                                      | P26641  | EF1G_HUMAN  | 1  | 1  | 0  | 0  | 3  | 1  | 0  | 0  | 1  | 0  | 2  | 0  | 0  | 0  | 2  | 0  | 0  | 0  | 0  | 0   | 0  | 0  | 0  | 0  | 0  | 0  | 0  |    |
| Elongation factor 2                                                            | P13639  | EF2_HUMAN   | 2  | 3  | 0  | 0  | 0  | 2  | 4  | 0  | 6  | 1  | 0  | 3  | 4  | 1  | 6  | 2  | 0  | 0  | 0  | 0   | 0  | 0  | 0  | 0  | 0  | 0  | 0  |    |
| Enteropeptidase                                                                | P98073  | ENTK_HUMAN  | 27 | 26 | 42 | 37 | 23 | 20 | 13 | 39 | 32 | 35 | 20 | 18 | 13 | 39 | 34 | 33 | 15 | 38 | 0  | 110 | 49 | 39 | 12 | 32 | 0  | 99 | 40 | 37 |
| Eosinophil cationic protein                                                    | P12724  | ECP_HUMAN   | 1  | 1  | 0  | 0  | 0  | 1  | 0  | 0  | 1  | 2  | 1  | 1  | 0  | 0  | 1  | 1  | 0  | 0  | 0  | 0   | 0  | 0  | 0  | 0  | 0  | 0  | 0  |    |
| Epididymal secretory protein E1                                                | P61916  | NPC2_HUMAN  | 1  | 1  | 0  | 0  | 0  | 1  | 0  | 0  | 1  | 2  | 0  | 1  | 0  | 0  | 1  | 2  | 0  | 0  | 0  | 0   | 0  | 0  | 0  | 0  | 0  | 0  | 0  |    |
| Epithelial cell adhesion molecule                                              | P16422  | EPCAM_HUMAN | 2  | 2  | 0  | 0  | 2  | 1  | 1  | 4  | 2  | 2  | 1  | 1  | 4  | 2  | 2  | 0  | 0  | 0  | 0  | 0   | 0  | 0  | 0  | 0  | 0  | 0  | 0  |    |
| Epoxide hydrolase 1                                                            | P07099  | HYEP_HUMAN  | 2  | 2  | 0  | 0  | 1  | 0  | 1  | 5  | 2  | 1  | 1  | 0  | 1  | 4  | 2  | 1  | 0  | 0  | 0  | 0   | 0  | 0  | 0  | 0  | 0  | 0  | 0  |    |
| Eukaryotic initiation factor 4A-1                                              | P60842  | IF4A1_HUMAN | 0  | 0  | 0  | 0  | 0  | 0  | 0  | 0  | 1  | 0  | 0  | 0  | 0  | 0  | 2  | 0  | 0  | 0  | 0  | 0   | 0  | 0  | 0  | 0  | 0  | 0  | 0  |    |
| Ezrin                                                                          | P15311  | EZRI_HUMAN  | 1  | 1  | 0  | 0  | 0  | 1  | 3  | 1  | 2  | 0  | 0  | 1  | 2  | 0  | 2  | 0  | 0  | 0  | 0  | 0   | 0  | 0  | 0  | 0  | 0  | 0  | 0  |    |
| Fatty acid-binding protein, intestinal                                         | P12104  | FABPI_HUMAN | 3  | 3  | 0  | 0  | 0  | 8  | 10 | 0  | 0  | 0  | 0  | 8  | 9  | 0  | 0  | 0  | 0  | 0  | 0  | 0   | 0  | 0  | 0  | 0  | 0  | 0  | 0  |    |
| Fatty acid-binding protein, liver                                              | P07148  | FABPL_HUMAN | 15 | 15 | 0  | 0  | 1  | 20 | 18 | 19 | 20 | 14 | 1  | 21 | 19 | 18 | 21 | 11 | 0  | 0  | 0  | 0   | 0  | 0  | 0  | 0  | 0  | 0  | 0  |    |
| Ferritin light chain                                                           | P02792  | FRIL_HUMAN  | 1  | 1  | 4  | 3  | 5  | 0  | 1  | 0  | 0  | 0  | 3  | 0  | 2  | 0  | 0  | 5  | 5  | 5  | 7  | 0   | 4  | 5  | 5  | 5  | 5  | 0  | 0  |    |
| Fibrinogen beta chain                                                          | P02675  | FIBB_HUMAN  | 24 | 26 | 1  | 1  | 2  | 24 | 25 | 36 | 41 | 16 | 2  | 23 | 27 | 44 | 44 | 16 | 0  | 5  | 0  | 0   | 0  | 0  | 0  | 5  | 0  | 0  | 0  |    |
| Filaggrin                                                                      | P20930  | FILA_HUMAN  | 1  | 1  | 0  | 0  | 0  | 1  | 0  | 1  | 0  | 2  | 0  | 1  | 0  | 1  | 0  | 1  | 0  | 0  | 0  | 0   | 0  | 0  | 0  | 0  | 0  | 0  | 0  |    |
| Filaggrin-2                                                                    | Q5D862  | FILA2_HUMAN | 1  | 1  | 2  | 2  | 0  | 1  | 2  | 1  | 0  | 1  | 0  | 1  | 2  | 1  | 0  | 1  | 0  | 5  | 0  | 5   | 0  | 0  | 5  | 0  | 0  | 4  | 0  |    |
| Flavin reductase                                                               | P30043  | BLVRB_HUMAN | 0  | 0  | 0  | 0  | 0  | 0  | 0  | 1  | 1  | 0  | 0  | 0  | 0  | 1  | 1  | 0  | 0  | 0  | 0  | 0   | 0  | 0  | 0  | 0  | 0  | 0  | 0  |    |
| Fructose-1,6-bisphosphatase 1                                                  | P09467  | F16P1_HUMAN | 0  | 0  | 0  | 0  | 0  | 0  | 2  | 0  | 0  | 0  | 0  | 0  | 1  | 0  | 0  | 0  | 0  | 0  | 0  | 0   | 0  | 0  | 0  | 0  | 0  | 0  | 0  |    |
| Fructose-bisphosphate aldolase B                                               | P05062  | ALDOB_HUMAN | 25 | 24 | 0  | 0  | 14 | 25 | 44 | 37 | 22 | 5  | 14 | 26 | 40 | 36 | 23 | 3  | 0  | 0  | 0  | 0   | 0  | 0  | 0  | 0  | 0  | 0  | 0  |    |
| Galectin-3                                                                     | P17931  | LEG3_HUMAN  | 4  | 4  | 0  | 0  | 10 | 2  | 4  | 1  | 5  | 2  | 12 | 2  | 3  | 0  | 6  | 3  | 0  | 0  | 0  | 0   | 0  | 0  | 0  | 0  | 0  | 0  | 0  |    |
| Galectin-3-binding protein                                                     | Q08380  | LG3BP_HUMAN | 6  | 6  | 11 | 8  | 12 | 1  | 1  | 8  | 2  | 14 | 11 | 1  | 1  | 9  | 2  | 14 | 0  | 0  | 7  | 5   | 54 | 0  | 0  | 0  | 0  | 0  | 48 |    |
| Galectin-4                                                                     | P56470  | LEG4_HUMAN  | 5  | 5  | 6  | 6  | 6  | 3  | 6  | 6  | 6  | 5  | 6  | 3  | 5  | 6  | 6  | 5  | 10 | 5  | 0  | 14  | 9  | 0  | 8  | 5  | 0  | 12 | 8  | 0  |
| Galectin-7                                                                     | P47929  | LEG7_HUMAN  | 3  | 3  | 4  | 3  | 0  | 0  | 0  | 0  | 14 | 3  | 0  | 0  | 0  | 0  | 14 | 3  | 0  | 0  | 21 | 0   | 0  | 0  | 0  | 0  | 0  | 17 | 0  | 0  |
| Gastric triacylglycerol lipase                                                 | P07098  | LIPG_HUMAN  | 15 | 17 | 5  | 5  | 0  | 0  | 3  | 1  | 5  | 82 | 0  | 0  | 3  | 1  | 5  | 94 | 10 | 0  | 0  | 0   | 0  | 22 | 8  | 0  | 0  | 0  | 21 |    |
| Gastricin                                                                      | P20142  | PEPC_HUMAN  | 5  | 5  | 0  | 0  | 2  | 0  | 2  | 4  | 1  | 21 | 3  | 0  | 3  | 5  | 1  | 20 | 0  | 0  | 0  | 0   | 0  | 0  | 0  | 0  | 0  | 0  | 0  |    |
| GDP-mannose 4,6 dehydratase                                                    | O60547  | GMDS_HUMAN  | 0  | 0  | 0  | 0  | 0  | 0  | 1  | 0  | 1  | 0  | 0  | 0  | 1  | 0  | 1  | 0  | 0  | 0  | 0  | 0   | 0  | 0  | 0  | 0  | 0  | 0  | 0  |    |
| Gelsolin                                                                       | P06396  | GELS_HUMAN  | 2  | 1  | 0  | 0  | 0  | 1  | 1  | 1  | 5  | 0  | 0  | 0  | 0  | 1  | 0  | 3  | 0  | 0  | 0  | 0   | 0  | 0  | 0  | 0  | 0  | 0  | 0  |    |
| Glucose-6-phosphate isomerase                                                  | P06744  | G6PI_HUMAN  | 7  | 6  | 6  | 5  | 5  | 4  | 7  | 12 | 8  | 5  | 4  | 5  | 5  | 9  | 5  | 10 | 0  | 0  | 0  | 15  | 11 | 8  | 0  | 0  | 0  | 12 | 9  |    |
| Glucosidase 2 subunit beta                                                     | P14314  | GLU2B_HUMAN | 1  | 1  | 0  | 0  | 2  | 0  | 0  | 0  | 1  | 0  | 2  | 0  | 0  | 0  | 1  | 0  | 0  | 0  | 0  | 0   | 0  | 0  | 0  | 0  | 0  | 0  | 0  |    |
| Glutamyl aminopeptidase                                                        | Q07075  | AMPE_HUMAN  | 3  | 3  | 2  | 1  | 7  | 0  | 0  | 4  | 4  | 3  | 9  | 0  | 0  | 4  | 3  | 3  | 0  | 0  | 0  | 9   | 3  | 0  | 0  | 0  | 0  | 4  | 3  |    |
| Glutaredoxin-1                                                                 | P35754  | GLRX1_HUMAN | 1  | 1  | 0  | 0  | 0  | 0  | 1  | 1  | 5  | 0  | 0  | 1  | 1  | 5  | 0  | 0  | 0  | 0  | 0  | 0   | 0  | 0  | 0  | 0  | 0  | 0  | 0  |    |
| Glutathione S-transferase A1                                                   | P08263  | GSTA1_HUMAN | 3  | 3  | 0  | 0  | 0  | 9  | 9  | 1  | 0  | 1  | 0  | 8  | 9  | 0  | 0  | 0  | 0  | 0  | 0  | 0   | 0  | 0  | 0  | 0  | 0  | 0  | 0  |    |
| Glutathione S-transferase omega-1                                              | P78417  | GSTO1_HUMAN | 2  | 1  | 0  | 0  | 1  | 1  | 2  | 1  | 4  | 1  | 1  | 1  | 2  | 1  | 2  | 1  | 0  | 0  | 0  | 0   | 0  | 0  | 0  | 0  | 0  | 0  | 0  |    |
| Glutathione S-transferase P                                                    | P09211  | GSTP1_HUMAN | 6  | 5  | 2  | 2  | 5  | 5  | 6  | 5  | 9  | 6  | 4  | 5  | 4  | 5  | 9  | 5  | 0  | 0  | 0  | 14  | 0  | 0  | 0  | 0  | 0  | 12 | 0  | 0  |
| G                                                                              |         |             |    |    |    |    |    |    |    |    |    |    |    |    |    |    |    |    |    |    |    |     |    |    |    |    |    |    |    |    |

|                                                                  |          |             |     |     |     |     |     |     |     |     |     |     |     |     |     |     |     |     |     |     |     |     |     |     |     |     |     |     |     |     |
|------------------------------------------------------------------|----------|-------------|-----|-----|-----|-----|-----|-----|-----|-----|-----|-----|-----|-----|-----|-----|-----|-----|-----|-----|-----|-----|-----|-----|-----|-----|-----|-----|-----|-----|
| Hemopexin                                                        | P02790   | HEMO_HUMAN  | 30  | 32  | 2   | 2   | 15  | 40  | 32  | 30  | 31  | 30  | 16  | 45  | 37  | 30  | 33  | 28  | 10  | 0   | 0   | 0   | 0   | 8   | 0   | 0   | 0   | 0   | 3   |     |
| Histidine ammonia-lyase                                          | P42357   | HUTH_HUMAN  | 0   | 0   | 0   | 0   | 0   | 0   | 0   | 0   | 2   | 0   | 0   | 0   | 0   | 0   | 2   | 0   | 0   | 0   | 0   | 0   | 0   | 0   | 0   | 0   | 0   | 0   | 0   |     |
| Histidine-rich glycoprotein                                      | P04196   | HRG_HUMAN   | 4   | 4   | 1   | 1   | 0   | 0   | 3   | 1   | 15  | 2   | 0   | 0   | 3   | 1   | 14  | 5   | 0   | 0   | 0   | 0   | 5   | 0   | 0   | 0   | 0   | 4   | 0   |     |
| Histone H1.3                                                     | P16402   | H13_HUMAN   | 0   | 0   | 0   | 0   | 0   | 0   | 0   | 0   | 1   | 0   | 0   | 0   | 0   | 1   | 0   | 0   | 0   | 0   | 0   | 0   | 0   | 0   | 0   | 0   | 0   | 0   | 0   |     |
| Histone H2A type 1-B/E                                           | P04908   | H2A1B_HUMAN | 1   | 1   | 5   | 4   | 0   | 0   | 0   | 0   | 5   | 0   | 0   | 0   | 0   | 6   | 0   | 0   | 5   | 0   | 14  | 9   | 0   | 0   | 5   | 0   | 12  | 4   | 0   |     |
| Histone H3.1                                                     | P68431   | H31_HUMAN   | 1   | 1   | 0   | 0   | 0   | 0   | 0   | 3   | 0   | 1   | 0   | 0   | 2   | 0   | 1   | 0   | 0   | 0   | 0   | 0   | 0   | 0   | 0   | 0   | 0   | 0   | 0   |     |
| Histone H4                                                       | P62805   | H4_HUMAN    | 5   | 4   | 7   | 8   | 0   | 1   | 19  | 0   | 6   | 1   | 0   | 1   | 17  | 0   | 6   | 2   | 0   | 16  | 0   | 14  | 9   | 3   | 0   | 13  | 0   | 17  | 12  | 3   |
| HLA class I histocompatibility antigen, A-33 alpha chain         | P16190   | 1A33_HUMAN  | 1   | 0   | 0   | 0   | 1   | 0   | 0   | 0   | 1   | 1   | 1   | 0   | 0   | 0   | 0   | 1   | 0   | 0   | 0   | 0   | 0   | 0   | 0   | 0   | 0   | 0   | 0   |     |
| HLA class I histocompatibility antigen, B-15 alpha chain         | P30464   | 1B15_HUMAN  | 1   | 1   | 0   | 0   | 1   | 0   | 0   | 1   | 1   | 2   | 1   | 0   | 0   | 1   | 1   | 2   | 0   | 0   | 0   | 0   | 0   | 0   | 0   | 0   | 0   | 0   | 0   |     |
| HLA class II histocompatibility antigen, DR alpha chain          | P01903   | DRA_HUMAN   | 1   | 1   | 0   | 0   | 1   | 0   | 0   | 0   | 2   | 1   | 1   | 0   | 0   | 2   | 1   | 0   | 0   | 0   | 0   | 0   | 0   | 0   | 0   | 0   | 0   | 0   | 0   |     |
| HLA class II histocompatibility antigen, DRB1-11 beta chain      | P20039   | 2B1B_HUMAN  | 1   | 1   | 0   | 0   | 1   | 1   | 0   | 1   | 1   | 2   | 1   | 1   | 0   | 1   | 0   | 1   | 0   | 0   | 0   | 0   | 0   | 0   | 0   | 0   | 0   | 0   | 0   |     |
| Hornerin                                                         | Q86VZ3   | HORN_HUMAN  | 2   | 2   | 1   | 1   | 1   | 1   | 3   | 2   | 2   | 1   | 1   | 2   | 2   | 2   | 1   | 1   | 0   | 0   | 0   | 7   | 0   | 0   | 0   | 0   | 0   | 5   | 0   |     |
| Hydroxymethylglutaryl-CoA synthase, mitochondrial                | P54868   | HMCS2_HUMAN | 2   | 2   | 0   | 0   | 0   | 0   | 2   | 0   | 11  | 0   | 0   | 0   | 2   | 0   | 12  | 0   | 0   | 0   | 0   | 0   | 0   | 0   | 0   | 0   | 0   | 0   | 0   |     |
| Ig alpha-1 chain C region                                        | P01876   | IGHA1_HUMAN | 191 | 187 | 247 | 234 | 268 | 130 | 132 | 230 | 134 | 254 | 254 | 124 | 124 | 225 | 126 | 267 | 254 | 330 | 120 | 140 | 251 | 387 | 256 | 315 | 110 | 132 | 234 | 354 |
| Ig alpha-2 chain C region                                        | P01877   | IGHA2_HUMAN | 145 | 139 | 290 | 284 | 207 | 94  | 97  | 167 | 111 | 192 | 200 | 89  | 89  | 157 | 107 | 192 | 303 | 381 | 132 | 234 | 357 | 333 | 281 | 369 | 110 | 198 | 427 | 319 |
| Ig gamma-1 chain C region                                        | P01857   | IGHG1_HUMAN | 128 | 121 | 132 | 121 | 64  | 164 | 159 | 133 | 121 | 125 | 62  | 154 | 148 | 123 | 117 | 124 | 168 | 55  | 162 | 183 | 149 | 76  | 153 | 45  | 179 | 144 | 133 | 69  |
| Ig gamma-2 chain C region                                        | P01859   | IGHG2_HUMAN | 67  | 69  | 82  | 68  | 57  | 97  | 75  | 79  | 39  | 55  | 53  | 90  | 81  | 79  | 48  | 60  | 96  | 55  | 132 | 147 | 44  | 18  | 82  | 45  | 132 | 104 | 28  | 15  |
| Ig gamma-3 chain C region                                        | P01860   | IGHG3_HUMAN | 65  | 62  | 78  | 72  | 47  | 81  | 77  | 69  | 52  | 61  | 42  | 78  | 74  | 65  | 50  | 61  | 120 | 33  | 102 | 110 | 77  | 28  | 99  | 35  | 110 | 87  | 72  | 27  |
| Ig gamma-4 chain C region                                        | P01861   | IGHG4_HUMAN | 68  | 70  | 69  | 61  | 47  | 92  | 78  | 82  | 51  | 60  | 43  | 91  | 82  | 80  | 58  | 65  | 96  | 33  | 102 | 124 | 44  | 14  | 87  | 27  | 100 | 87  | 48  | 18  |
| Ig heavy chain V-I region HG3                                    | P01743   | HV102_HUMAN | 4   | 7   | 2   | 1   | 4   | 5   | 1   | 4   | 6   | 5   | 6   | 9   | 3   | 6   | 7   | 10  | 0   | 0   | 0   | 0   | 0   | 0   | 0   | 0   | 0   | 0   | 8   | 0   |
| Ig heavy chain V-II region ARH-77                                | P06331   | HV209_HUMAN | 2   | 3   | 10  | 10  | 2   | 1   | 1   | 1   | 5   | 5   | 1   | 2   | 1   | 2   | 7   | 0   | 11  | 0   | 14  | 24  | 11  | 0   | 9   | 0   | 12  | 28  | 9   | 0   |
| Ig heavy chain V-III region BRO                                  | P01766   | HV305_HUMAN | 26  | 27  | 39  | 33  | 28  | 29  | 19  | 30  | 21  | 29  | 29  | 29  | 19  | 31  | 22  | 31  | 24  | 22  | 5   | 82  | 44  | 57  | 21  | 18  | 11  | 61  | 40  | 48  |
| Ig heavy chain V-III region BUT                                  | P01767   | HV306_HUMAN | 11  | 10  | 7   | 6   | 14  | 11  | 9   | 13  | 8   | 12  | 13  | 10  | 9   | 12  | 7   | 11  | 0   | 0   | 14  | 15  | 11  | 0   | 0   | 0   | 12  | 12  | 9   | 0   |
| Ig heavy chain V-III region CAM                                  | P01768   | HV307_HUMAN | 1   | 1   | 0   | 0   | 1   | 0   | 1   | 0   | 1   | 1   | 0   | 0   | 1   | 0   | 3   | 0   | 0   | 0   | 0   | 0   | 0   | 0   | 0   | 0   | 0   | 0   | 0   | 0   |
| Ig heavy chain V-III region GA                                   | P01769   | HV308_HUMAN | 1   | 1   | 3   | 2   | 0   | 1   | 0   | 1   | 0   | 1   | 0   | 1   | 0   | 1   | 0   | 1   | 0   | 0   | 0   | 15  | 0   | 0   | 0   | 0   | 0   | 12  | 0   | 0   |
| Ig heavy chain V-III region GAL                                  | P01781   | HV320_HUMAN | 4   | 4   | 6   | 5   | 7   | 2   | 1   | 6   | 1   | 7   | 6   | 2   | 1   | 6   | 1   | 7   | 5   | 0   | 0   | 7   | 15  | 8   | 4   | 0   | 0   | 5   | 12  | 6   |
| Ig heavy chain V-III region TUR                                  | P01779   | HV318_HUMAN | 11  | 11  | 31  | 25  | 19  | 1   | 7   | 12  | 8   | 16  | 20  | 1   | 8   | 14  | 7   | 16  | 5   | 33  | 18  | 59  | 49  | 22  | 4   | 27  | 21  | 38  | 40  | 18  |
| Ig heavy chain V-III region VH26                                 | P01764   | HV303_HUMAN | 13  | 17  | 25  | 34  | 26  | 5   | 9   | 13  | 8   | 16  | 31  | 5   | 12  | 20  | 12  | 23  | 5   | 16  | 0   | 66  | 29  | 36  | 8   | 35  | 21  | 54  | 57  | 30  |
| Ig heavy chain V-III region WEA                                  | P01763   | HV302_HUMAN | 10  | 10  | 9   | 8   | 12  | 10  | 9   | 11  | 8   | 12  | 12  | 9   | 9   | 12  | 7   | 11  | 0   | 0   | 14  | 29  | 11  | 0   | 0   | 0   | 12  | 25  | 9   | 0   |
| Ig kappa chain C region                                          | P01834   | IGKC_HUMAN  | 175 | 162 | 342 | 314 | 164 | 155 | 160 | 200 | 116 | 254 | 148 | 143 | 146 | 183 | 112 | 241 | 298 | 369 | 264 | 456 | 395 | 272 | 264 | 333 | 231 | 446 | 358 | 249 |
| Ig kappa chain V-I region DEE                                    | P01597   | KV105_HUMAN | 1   | 1   | 1   | 2   | 1   | 2   | 1   | 1   | 1   | 2   | 2   | 1   | 0   | 0   | 1   | 0   | 0   | 0   | 5   | 3   | 0   | 0   | 5   | 0   | 0   | 4   | 3   | 0   |
| Ig kappa chain V-I region HK101 (Fragment)                       | P01601   | KV109_HUMAN | 1   | 2   | 0   | 7   | 1   | 1   | 1   | 0   | 0   | 1   | 3   | 4   | 2   | 1   | 1   | 1   | 0   | 0   | 0   | 0   | 0   | 0   | 0   | 9   | 0   | 17  | 4   | 9   |
| Ig kappa chain V-I region HK102 (Fragment)                       | P01602   | KV110_HUMAN | 1   | 3   | 5   | 6   | 2   | 0   | 1   | 1   | 1   | 3   | 5   | 2   | 3   | 2   | 2   | 5   | 5   | 5   | 0   | 7   | 9   | 3   | 4   | 5   | 0   | 12  | 8   | 6   |
| Ig kappa chain V-I region Scw                                    | P01609   | KV117_HUMAN | 2   | 2   | 6   | 6   | 3   | 3   | 2   | 1   | 1   | 2   | 3   | 4   | 2   | 2   | 1   | 2   | 0   | 5   | 0   | 21  | 5   | 3   | 0   | 9   | 0   | 17  | 4   | 6   |
| Ig kappa chain V-II region GM607 (Fragment)                      | P06309   | KV205_HUMAN | 7   | 7   | 23  | 19  | 6   | 7   | 6   | 7   | 6   | 9   | 6   | 6   | 5   | 8   | 6   | 9   | 19  | 11  | 5   | 51  | 34  | 18  | 17  | 9   | 5   | 38  | 28  | 15  |
| Ig kappa chain V-III region CLL                                  | P04207   | KV308_HUMAN | 3   | 3   | 4   | 5   | 2   | 3   | 2   | 2   | 5   | 2   | 3   | 2   | 2   | 2   | 7   | 10  | 0   | 0   | 11  | 8   | 5   | 0   | 0   | 0   | 4   | 12  | 4   | 12  |
| Ig kappa chain V-III region NG9 (Fragment)                       | P01621   | KV303_HUMAN | 4   | 9   | 9   | 13  | 6   | 3   | 4   | 1   | 2   | 6   | 10  | 8   | 8   | 8   | 6   | 14  | 10  | 11  | 18  | 0   | 5   | 8   | 17  | 9   | 16  | 17  | 12  | 9   |
| Ig kappa chain V-III region SIE                                  | P01620   | KV302_HUMAN | 15  | 15  | 33  | 28  | 14  | 11  | 11  | 19  | 9   | 24  | 13  | 11  | 12  | 19  | 9   | 23  | 34  | 27  | 24  | 59  | 38  | 14  | 29  | 27  | 21  | 45  | 32  | 15  |
| Ig kappa chain V-III region VG (Fragment)                        | P04433   | KV309_HUMAN | 2   | 5   | 5   | 14  | 2   | 1   | 3   | 1   | 2   | 2   | 3   | 4   | 8   | 5   | 6   | 6   | 10  | 5   | 0   | 0   | 5   | 8   | 17  | 13  | 5   | 17  | 16  | 18  |
| Ig kappa chain V-IV region (Fragment)                            | P06312   | KV401_HUMAN | 9   | 9   | 28  | 25  | 5   | 10  | 9   | 11  | 6   | 10  | 8   | 9   | 10  | 9   | 6   | 11  | 19  | 27  | 12  | 44  | 38  | 28  | 17  | 27  | 11  | 33  | 36  | 27  |
| Ig lambda chain V-I region WAH                                   | P04208   | LV106_HUMAN | 2   | 3   | 5   | 4   | 2   | 3   | 2   | 2   | 1   | 3   | 3   | 4   | 2   | 5   | 1   | 3   | 5   | 5   | 0   | 7   | 15  | 0   | 4   | 5   | 0   | 5   | 8   | 0   |
| Ig lambda chain V-III region LOI                                 | P80748   | LV302_HUMAN | 5   | 6   | 7   | 8   | 4   | 5   | 6   | 4   | 5   | 8   | 4   | 8   | 4   | 4   | 6   | 9   | 15  | 0   | 0   | 14  | 9   | 3   | 12  | 9   | 0   | 12  | 8   | 6   |
| Ig lambda chain V-III region SH                                  | P01714   | LV301_HUMAN | 2   | 2   | 4   | 4   | 1   | 3   | 2   | 1   | 1   | 2   | 1   | 3   | 3   | 1   | 1   | 2   | 5   | 0   | 0   | 0   | 0   | 9   | 8   | 4   | 0   | 0   | 0   | 9   |
| Ig lambda-2 chain C regions                                      | P0CG05   | LAC2_HUMAN  | 79  | 71  | 151 | 132 | 81  | 95  | 84  | 63  | 48  | 102 | 69  | 87  | 72  | 60  | 45  | 91  | 154 | 165 | 107 | 147 | 231 | 100 | 133 | 144 | 94  | 127 | 206 | 87  |
| Ig mu heavy chain disease protein                                | P04220   | MUCB_HUMAN  | 53  | 52  | 93  | 90  | 82  | 37  | 21  | 59  | 35  | 83  | 79  | 38  | 22  | 57  | 34  | 82  | 105 | 149 | 42  | 0   | 62  | 197 | 95  | 144 | 32  | 5   | 57  | 204 |
| IgGfC-binding protein                                            | Q9Y6R7   | FCGBP_HUMAN | 50  | 47  | 162 | 138 | 54  | 23  | 29  | 93  | 35  | 55  | 50  | 22  | 37  | 89  | 35  | 50  | 193 | 116 | 126 | 169 | 188 | 179 | 182 | 90  | 94  | 137 | 165 | 157 |
| Immunoglobulin J chain                                           | P01591   | IGJ_HUMAN   | 18  | 18  | 18  | 16  | 18  | 15  | 15  | 27  | 9   | 24  | 18  | 14  | 14  | 25  | 10  | 24  | 24  | 38  | 5   | 0   | 15  | 28  | 17  | 32  | 5   | 0   | 16  | 24  |
| Immunoglobulin lambda-like polypeptide 5                         | B9A064   | IGLL5_HUMAN | 50  | 45  | 94  | 84  | 54  | 60  | 47  | 43  | 28  | 69  | 46  | 53  | 42  | 40  | 23  | 65  | 101 | 100 | 42  | 131 | 111 | 79  | 82  | 90  | 43  | 116 | 105 | 69  |
| Intelectin-1                                                     | Q8WWWA0  | ITLN1_HUMAN | 5   | 5   | 18  | 16  | 2   | 11  | 2   | 5   | 5   | 7   | 1   | 9   | 2   | 5   | 5   | 7   | 53  | 5   | 0   | 7   | 20  | 22  | 58  | 0   | 0   | 5   | 12  | 18  |
| Intelectin-2                                                     | Q8WWWU7  | ITLN2_HUMAN | 3   | 3   | 10  | 10  | 1   | 2   | 0   | 1   | 6   | 5   | 1   | 2   | 1   | 1   | 6   | 5   | 10  | 0   | 0   | 38  | 14  | 12  | 0   | 0   | 0   | 0   | 36  | 12  |
| Inter-alpha-trypsin inhibitor heavy chain H1                     | P19827   | ITIH1_HUMAN | 2   | 1   | 0   | 0   | 0   | 0   | 3   | 1   | 4   | 1   | 0   | 0   | 2   | 0   | 2   | 0   | 0   | 0   | 0   | 0   | 0   | 0   | 0   | 0   | 0   | 0   | 0   | 0   |
| Intercellular adhesion molecule 1                                | P05362   | ICAM1_HUMAN | 1   | 1   | 0   | 0   | 0   | 0   | 0   | 0   | 0   | 6   | 0   | 0   | 0   | 0   | 0   | 7   | 0   | 0   | 0   | 0   | 0   | 0   | 0   | 0   | 0   | 0   | 0   | 0   |
| Intestinal-type alkaline phosphatase                             | P09923   | PPBI_HUMAN  | 5   | 5   | 79  | 76  | 13  | 1   | 1   | 6   | 6   | 0   | 12  | 1   | 1   | 6   | 6   | 1   | 120 | 160 | 35  | 21  | 97  | 39  | 124 | 153 | 27  | 21  | 97  | 33  |
| Involucrin                                                       | P07476   | INVO_HUMAN  | 1   | 1   | 0   | 0   | 0   | 0   | 0   | 0   | 5   | 0   | 0   | 0   | 0   | 0   | 0   | 5   | 0   | 0   | 0   | 0   | 0   | 0   | 0   | 0   | 0   | 0   | 0   | 0   |
| Isoform 1 of Glycerol kinase                                     | P32189-1 | GLPK_HUMAN  | 0   | 0   | 0   | 0   | 0   | 0   | 0   | 0   | 0   | 1   | 0   | 0   | 0   | 0   | 0   | 2   | 0   | 0   | 0   | 0   | 0   | 0   | 0   | 0   | 0   | 0   | 0   | 0   |
| Isoform 1 of Protein POF1B                                       | Q8WVV4-1 | POF1B_HUMAN | 1   | 1   | 0   | 0   | 0   | 0   | 0   | 0   | 4   | 1   | 0   | 0   | 0   | 0   | 0   | 3   | 1   | 0   | 0   | 0   | 0   | 0   | 0   | 0   | 0   | 0   | 0   | 0   |
| Isoform 1 of Voltage-dependent anion-selective channel protein 2 | P45880-1 | VDAC2_HUMAN | 1   | 1   | 0   | 0   | 0   | 0   | 0   | 2   | 1   | 0   | 0   |     |     |     |     |     |     |     |     |     |     |     |     |     |     |     |     |     |





|                                                                      |        |             |     |     |     |     |     |     |     |     |     |     |     |     |     |     |     |     |     |     |     |     |     |     |     |     |     |     |     |     |
|----------------------------------------------------------------------|--------|-------------|-----|-----|-----|-----|-----|-----|-----|-----|-----|-----|-----|-----|-----|-----|-----|-----|-----|-----|-----|-----|-----|-----|-----|-----|-----|-----|-----|-----|
| Mucin-6                                                              | Q6W4X9 | MUC6_HUMAN  | 29  | 27  | 10  | 16  | 29  | 5   | 17  | 54  | 31  | 36  | 29  | 3   | 16  | 51  | 27  | 38  | 10  | 5   | 0   | 7   | 24  | 14  | 12  | 18  | 0   | 5   | 28  | 33  |
| Multimerin-1                                                         | Q13201 | MMRN1_HUMAN | 0   | 0   | 0   | 0   | 0   | 0   | 0   | 0   | 0   | 0   | 0   | 0   | 1   | 0   | 0   | 0   | 0   | 0   | 0   | 0   | 0   | 0   | 0   | 0   | 0   | 0   | 0   | 0   |
| Myeloblastin                                                         | P24158 | PRTN3_HUMAN | 1   | 1   | 1   | 1   | 0   | 0   | 0   | 0   | 0   | 5   | 0   | 0   | 0   | 0   | 0   | 5   | 0   | 0   | 0   | 0   | 3   | 0   | 0   | 0   | 0   | 0   | 0   | 3   |
| Myosin regulatory light chain 12B                                    | O14950 | ML12B_HUMAN | 2   | 2   | 0   | 0   | 1   | 1   | 2   | 2   | 5   | 0   | 0   | 0   | 2   | 2   | 5   | 0   | 0   | 0   | 0   | 0   | 0   | 0   | 0   | 0   | 0   | 0   | 0   | 0   |
| Myosin-9                                                             | P35579 | MYH9_HUMAN  | 1   | 1   | 1   | 0   | 0   | 0   | 1   | 0   | 2   | 2   | 0   | 0   | 0   | 0   | 2   | 2   | 0   | 0   | 0   | 7   | 0   | 0   | 0   | 0   | 0   | 0   | 0   | 0   |
| Na(+)/H(+) exchange regulatory cofactor NHE-RF1                      | O14745 | NHRF1_HUMAN | 1   | 1   | 0   | 0   | 0   | 1   | 3   | 1   | 2   | 0   | 0   | 1   | 3   | 0   | 2   | 0   | 0   | 0   | 0   | 0   | 0   | 0   | 0   | 0   | 0   | 0   | 0   | 0   |
| NADH dehydrogenase [ubiquinone] iron-sulfur protein 3, mitochondrial | O75489 | NDUS3_HUMAN | 0   | 0   | 0   | 0   | 1   | 0   | 0   | 1   | 0   | 0   | 1   | 0   | 0   | 1   | 0   | 0   | 0   | 0   | 0   | 0   | 0   | 0   | 0   | 0   | 0   | 0   | 0   | 0   |
| NADPH--cytochrome P450 reductase                                     | P16435 | NCPR_HUMAN  | 1   | 0   | 0   | 0   | 1   | 0   | 0   | 2   | 0   | 1   | 0   | 0   | 0   | 2   | 0   | 0   | 0   | 0   | 0   | 0   | 0   | 0   | 0   | 0   | 0   | 0   | 0   | 0   |
| Nephrilysin                                                          | P08473 | NEP_HUMAN   | 8   | 7   | 17  | 15  | 21  | 0   | 0   | 10  | 7   | 7   | 18  | 0   | 0   | 11  | 6   | 7   | 0   | 38  | 0   | 0   | 9   | 57  | 0   | 32  | 0   | 0   | 8   | 48  |
| Neuroblast differentiation-associated protein AHNAK                  | Q09666 | AHNK_HUMAN  | 1   | 0   | 0   | 0   | 0   | 0   | 0   | 0   | 4   | 0   | 0   | 0   | 1   | 0   | 1   | 0   | 0   | 0   | 0   | 0   | 0   | 0   | 0   | 0   | 0   | 0   | 0   | 0   |
| Neutrophil defensin 1                                                | P59665 | DEF1_HUMAN  | 7   | 6   | 0   | 0   | 4   | 0   | 1   | 6   | 1   | 28  | 3   | 0   | 1   | 6   | 1   | 24  | 0   | 0   | 0   | 0   | 0   | 0   | 0   | 0   | 0   | 0   | 0   | 0   |
| Neutrophil elastase                                                  | P08246 | ELNE_HUMAN  | 1   | 1   | 1   | 1   | 0   | 0   | 0   | 0   | 0   | 5   | 0   | 0   | 0   | 0   | 0   | 5   | 0   | 0   | 0   | 0   | 0   | 3   | 0   | 0   | 0   | 0   | 0   | 3   |
| Neutrophil gelatinase-associated lipocalin                           | P80188 | NGAL_HUMAN  | 4   | 3   | 6   | 6   | 1   | 0   | 0   | 1   | 1   | 18  | 1   | 0   | 0   | 1   | 17  | 19  | 0   | 0   | 0   | 0   | 5   | 14  | 17  | 0   | 0   | 0   | 4   | 12  |
| Olfactomedin-4                                                       | Q6UX06 | OLFM4_HUMAN | 25  | 25  | 99  | 98  | 40  | 7   | 4   | 39  | 24  | 38  | 39  | 6   | 3   | 38  | 23  | 39  | 58  | 94  | 0   | 110 | 145 | 189 | 66  | 85  | 0   | 111 | 141 | 187 |
| Ornithine aminotransferase, mitochondrial                            | P04181 | OAT_HUMAN   | 4   | 4   | 0   | 0   | 3   | 3   | 14  | 0   | 5   | 1   | 3   | 3   | 14  | 0   | 5   | 1   | 0   | 0   | 0   | 0   | 0   | 0   | 0   | 0   | 0   | 0   | 0   | 0   |
| Pancreatic alpha-amylase                                             | P04746 | AMYP_HUMAN  | 189 | 198 | 438 | 464 | 220 | 203 | 177 | 136 | 141 | 254 | 226 | 213 | 189 | 148 | 152 | 259 | 365 | 243 | 700 | 557 | 348 | 415 | 392 | 256 | 688 | 594 | 386 | 469 |
| Pancreatic lipase-related protein 1                                  | P54315 | LIPR1_HUMAN | 9   | 8   | 4   | 8   | 15  | 12  | 10  | 8   | 6   | 0   | 17  | 10  | 9   | 7   | 6   | 0   | 5   | 5   | 5   | 0   | 9   | 0   | 12  | 18  | 11  | 0   | 8   | 0   |
| Pancreatic lipase-related protein 2                                  | P54317 | LIPR2_HUMAN | 32  | 32  | 32  | 32  | 75  | 47  | 9   | 25  | 33  | 2   | 79  | 47  | 9   | 25  | 30  | 2   | 34  | 67  | 42  | 14  | 29  | 8   | 37  | 67  | 48  | 5   | 25  | 12  |
| Pancreatic triacylglycerol lipase                                    | P16233 | LIPP_HUMAN  | 247 | 273 | 189 | 206 | 425 | 294 | 234 | 230 | 244 | 53  | 484 | 325 | 260 | 251 | 266 | 53  | 216 | 325 | 311 | 59  | 159 | 61  | 235 | 360 | 331 | 54  | 185 | 72  |
| Pantetheinase                                                        | O95497 | VNN1_HUMAN  | 4   | 4   | 15  | 11  | 4   | 0   | 0   | 4   | 7   | 7   | 3   | 0   | 0   | 4   | 7   | 7   | 0   | 44  | 0   | 7   | 38  | 0   | 0   | 35  | 0   | 5   | 28  | 0   |
| Pepsin A                                                             | P00790 | PEPA_HUMAN  | 0   | 1   | 0   | 0   | 0   | 0   | 0   | 0   | 0   | 1   | 2   | 2   | 1   | 1   | 0   | 2   | 0   | 0   | 0   | 0   | 0   | 0   | 0   | 0   | 0   | 0   | 0   | 0   |
| Peptidyl-prolyl cis-trans isomerase B                                | P23284 | PPIB_HUMAN  | 1   | 1   | 0   | 0   | 0   | 1   | 4   | 0   | 1   | 1   | 0   | 1   | 3   | 0   | 1   | 1   | 0   | 0   | 0   | 0   | 0   | 0   | 0   | 0   | 0   | 0   | 0   | 0   |
| Periplakin                                                           | O60437 | PEPL_HUMAN  | 0   | 0   | 0   | 0   | 0   | 0   | 0   | 0   | 2   | 0   | 0   | 0   | 0   | 0   | 2   | 0   | 0   | 0   | 0   | 0   | 0   | 0   | 0   | 0   | 0   | 0   | 0   | 0   |
| Peroxiredoxin-1                                                      | Q06830 | PRDX1_HUMAN | 7   | 7   | 0   | 0   | 1   | 12  | 11  | 6   | 9   | 3   | 1   | 11  | 12  | 7   | 10  | 3   | 0   | 0   | 0   | 0   | 0   | 0   | 0   | 0   | 0   | 0   | 0   | 0   |
| Peroxiredoxin-2                                                      | P32119 | PRDX2_HUMAN | 4   | 3   | 0   | 0   | 0   | 3   | 12  | 1   | 6   | 1   | 0   | 2   | 11  | 1   | 6   | 0   | 0   | 0   | 0   | 0   | 0   | 0   | 0   | 0   | 0   | 0   | 0   | 0   |
| Peroxiredoxin-4                                                      | Q13162 | PRDX4_HUMAN | 3   | 2   | 0   | 0   | 2   | 3   | 4   | 4   | 2   | 1   | 2   | 3   | 3   | 4   | 1   | 1   | 0   | 0   | 0   | 0   | 0   | 0   | 0   | 0   | 0   | 0   | 0   | 0   |
| Peroxisomal acyl-coenzyme A oxidase 1                                | Q15067 | ACO1_HUMAN  | 0   | 0   | 0   | 0   | 0   | 0   | 0   | 0   | 1   | 0   | 0   | 0   | 0   | 0   | 2   | 0   | 0   | 0   | 0   | 0   | 0   | 0   | 0   | 0   | 0   | 0   | 0   | 0   |
| Peroxisomal multifunctional enzyme type 2                            | P51659 | DHB4_HUMAN  | 3   | 3   | 0   | 0   | 2   | 2   | 3   | 4   | 5   | 1   | 1   | 2   | 3   | 4   | 5   | 1   | 0   | 0   | 0   | 0   | 0   | 0   | 0   | 0   | 0   | 0   | 0   | 0   |
| Phenazine biosynthesis-like domain-containing protein                | P30039 | PBLD_HUMAN  | 0   | 0   | 0   | 0   | 0   | 0   | 1   | 0   | 0   | 0   | 0   | 0   | 1   | 0   | 0   | 0   | 0   | 0   | 0   | 0   | 0   | 0   | 0   | 0   | 0   | 0   | 0   | 0   |
| Phosphatidylethanolamine-binding protein 1                           | P30086 | PEBP1_HUMAN | 12  | 10  | 0   | 0   | 4   | 14  | 18  | 13  | 13  | 7   | 4   | 12  | 15  | 12  | 13  | 6   | 0   | 0   | 0   | 0   | 0   | 0   | 0   | 0   | 0   | 0   | 0   | 0   |
| Phosphoenolpyruvate carboxykinase [GTP], mitochondrial               | Q16822 | PCKGM_HUMAN | 6   | 6   | 0   | 0   | 0   | 1   | 32  | 0   | 1   | 0   | 0   | 1   | 31  | 0   | 1   | 0   | 0   | 0   | 0   | 0   | 0   | 0   | 0   | 0   | 0   | 0   | 0   | 0   |
| Phosphoglycerate kinase 1                                            | P00558 | PGK1_HUMAN  | 4   | 3   | 0   | 0   | 1   | 5   | 11  | 0   | 4   | 0   | 1   | 5   | 10  | 0   | 3   | 0   | 0   | 0   | 0   | 0   | 0   | 0   | 0   | 0   | 0   | 0   | 0   | 0   |
| Phosphoglycerate mutase 1                                            | P18669 | PGAM1_HUMAN | 2   | 3   | 0   | 0   | 1   | 2   | 3   | 1   | 6   | 0   | 1   | 3   | 4   | 1   | 6   | 0   | 0   | 0   | 0   | 0   | 0   | 0   | 0   | 0   | 0   | 0   | 0   | 0   |
| Phospholipase A2                                                     | P04054 | PA21B_HUMAN | 17  | 20  | 23  | 31  | 30  | 24  | 13  | 11  | 19  | 2   | 39  | 31  | 16  | 12  | 19  | 2   | 19  | 16  | 60  | 30  | 15  | 0   | 25  | 18  | 84  | 33  | 28  | 0   |
| Phospholipase A2, membrane associated                                | P14555 | PA2GA_HUMAN | 2   | 2   | 0   | 0   | 4   | 1   | 0   | 1   | 1   | 5   | 3   | 1   | 0   | 0   | 1   | 6   | 0   | 0   | 0   | 0   | 0   | 0   | 0   | 0   | 0   | 0   | 0   | 0   |
| Phospholysine phosphohistidine inorganic pyrophosphate phosphatase   | Q9H008 | LHPP_HUMAN  | 0   | 0   | 0   | 0   | 0   | 1   | 1   | 0   | 0   | 0   | 0   | 0   | 1   | 0   | 0   | 0   | 0   | 0   | 0   | 0   | 0   | 0   | 0   | 0   | 0   | 0   | 0   | 0   |
| Phosphomannomutase 2                                                 | O15305 | PMM2_HUMAN  | 0   | 0   | 0   | 0   | 0   | 0   | 1   | 0   | 0   | 0   | 0   | 0   | 1   | 0   | 0   | 0   | 0   | 0   | 0   | 0   | 0   | 0   | 0   | 0   | 0   | 0   | 0   | 0   |
| Plasma protease C1 inhibitor                                         | P05155 | ICI_HUMAN   | 11  | 12  | 0   | 0   | 6   | 13  | 10  | 13  | 9   | 12  | 5   | 14  | 12  | 14  | 12  | 15  | 0   | 0   | 0   | 0   | 0   | 0   | 0   | 0   | 0   | 0   | 0   | 0   |
| Plasma serine protease inhibitor                                     | P05154 | IPSP_HUMAN  | 2   | 2   | 0   | 0   | 1   | 1   | 1   | 2   | 4   | 1   | 1   | 1   | 1   | 4   | 2   | 1   | 0   | 0   | 0   | 0   | 0   | 0   | 0   | 0   | 0   | 0   | 0   | 0   |
| Plasminogen                                                          | P00747 | PLMN_HUMAN  | 2   | 2   | 0   | 0   | 2   | 4   | 2   | 1   | 1   | 0   | 2   | 3   | 2   | 1   | 1   | 0   | 0   | 0   | 0   | 0   | 0   | 0   | 0   | 0   | 0   | 0   | 0   | 0   |
| Plastin-1                                                            | Q14651 | PLS1_HUMAN  | 4   | 4   | 0   | 0   | 2   | 3   | 7   | 1   | 7   | 1   | 2   | 3   | 7   | 1   | 7   | 1   | 0   | 0   | 0   | 0   | 0   | 0   | 0   | 0   | 0   | 0   | 0   | 0   |
| Polymeric immunoglobulin receptor                                    | P01833 | PIGR_HUMAN  | 160 | 159 | 104 | 89  | 196 | 72  | 82  | 184 | 109 | 315 | 185 | 70  | 74  | 187 | 110 | 326 | 81  | 138 | 18  | 51  | 87  | 251 | 75  | 104 | 11  | 33  | 80  | 229 |
| Prelamin-A/C                                                         | P02545 | LMNA_HUMAN  | 2   | 1   | 0   | 0   | 0   | 1   | 2   | 0   | 4   | 2   | 0   | 1   | 2   | 0   | 2   | 1   | 0   | 0   | 0   | 0   | 0   | 0   | 0   | 0   | 0   | 0   | 0   | 0   |
| Profilin-1                                                           | P07737 | PROF1_HUMAN | 2   | 2   | 0   | 0   | 0   | 0   | 0   | 4   | 5   | 0   | 0   | 0   | 4   | 0   | 5   | 0   | 0   | 0   | 0   | 0   | 0   | 0   | 0   | 0   | 0   | 0   | 0   | 0   |
| Prolactin-inducible protein                                          | P12273 | PIP_HUMAN   | 7   | 7   | 2   | 3   | 2   | 0   | 0   | 0   | 0   | 42  | 2   | 0   | 0   | 0   | 0   | 40  | 0   | 0   | 0   | 0   | 14  | 0   | 0   | 0   | 0   | 0   | 0   | 18  |
| Prostaglandin reductase 1                                            | Q14914 | PTGR1_HUMAN | 1   | 0   | 0   | 0   | 1   | 0   | 0   | 0   | 5   | 0   | 0   | 0   | 0   | 0   | 2   | 0   | 0   | 0   | 0   | 0   | 0   | 0   | 0   | 0   | 0   | 0   | 0   | 0   |
| Prostaglandin-H2 D-isomerase                                         | P41222 | PTGDS_HUMAN | 1   | 1   | 0   | 0   | 5   | 0   | 0   | 0   | 0   | 0   | 4   | 0   | 0   | 0   | 0   | 1   | 0   | 0   | 0   | 0   | 0   | 0   | 0   | 0   | 0   | 0   | 0   | 0   |
| Prostasin                                                            | Q16651 | PRSS8_HUMAN | 2   | 4   | 0   | 0   | 3   | 1   | 0   | 1   | 4   | 3   | 5   | 1   | 0   | 4   | 5   | 6   | 0   | 0   | 0   | 0   | 0   | 0   | 0   | 0   | 0   | 0   | 0   | 0   |
| Prostate stem cell antigen                                           | O43653 | PSCA_HUMAN  | 1   | 1   | 0   | 0   | 2   | 0   | 0   | 0   | 0   | 2   | 3   | 0   | 0   | 0   | 0   | 3   | 0   | 0   | 0   | 0   | 0   | 0   | 0   | 0   | 0   | 0   | 0   | 0   |
| Proteasome subunit alpha type-2                                      | P25787 | PSA2_HUMAN  | 1   | 1   | 0   | 0   | 0   | 0   | 1   | 1   | 1   | 0   | 0   | 0   | 1   | 1   | 1   | 0   | 0   | 0   | 0   | 0   | 0   | 0   | 0   | 0   | 0   | 0   | 0   | 0   |
| Proteasome subunit alpha type-4                                      | P25789 | PSA4_HUMAN  | 0   | 0   | 0   | 0   | 0   | 1   | 1   | 0   | 0   | 0   | 0   | 0   | 1   | 0   | 0   | 0   | 0   | 0   | 0   | 0   | 0   | 0   | 0   | 0   | 0   | 0   | 0   | 0   |
| Proteasome subunit alpha type-6                                      | P60900 | PSA6_HUMAN  | 1   | 1   | 0   | 0   | 1   | 2   | 2   | 1   | 1   | 0   | 1   | 2   | 2   | 1   | 1   | 0   | 0   | 0   | 0   | 0   | 0   | 0   | 0   | 0   | 0   | 0   | 0   | 0   |
| Proteasome subunit beta type-1                                       | P20618 | PSB1_HUMAN  | 1   | 1   | 0   | 0   | 0   | 1   | 1   | 1   | 1   | 0   | 0   | 1   | 1   | 1   | 1   | 0   | 0   | 0   | 0   | 0   | 0   | 0   | 0   | 0   | 0   | 0   | 0   | 0   |
| Proteasome subunit beta type-2                                       | P49721 | PSB2_HUMAN  | 1   | 1   | 2   | 2   | 0   | 1   | 1   | 1   | 1   | 0   | 0   | 1   | 1   | 1   | 1   | 0   | 5   | 0   | 0   | 0   | 5   | 3   | 4   | 0   | 0   | 0   | 4   | 3   |
| Proteasome subunit beta type-3                                       | P49720 | PSB3_HUMAN  | 1   | 1   | 0   | 0   | 0   | 1   | 0   | 2   | 1   | 0   | 0   | 1   | 0   | 1   | 1   | 0   | 0   | 0   | 0   | 0   | 0   | 0   | 0   | 0   | 0   | 0   | 0   | 0   |
| Protein AMBP                                                         | P02760 | AMBP_HUMAN  | 4   | 3   | 0   | 0   | 1   | 3   | 2   | 1   | 5   | 13  | 1   | 2   | 2   | 1   | 3   | 11  | 0   | 0   | 0   | 0   | 0   | 0   | 0   | 0   | 0   | 0   | 0   | 0   |
| Protein disulfide-isomerase                                          | P07237 | PDIA1_HUMAN | 9   | 9   | 1   | 1   | 0   | 14  | 17  | 8   | 16  | 1   | 1   | 11  | 17  | 6   | 15  | 1   | 0   | 0   | 0   | 7   | 0   | 0   | 0   | 0   | 0   | 0   | 5   | 0   |
| Protein disulfide-isomerase A3                                       | P30101 | PDIA3_HUMAN | 2   | 1   | 0   | 0   | 0   | 3   | 4   | 0   | 2   | 0   | 0   | 2   | 4   | 0   | 2   | 0   | 0   | 0   | 0   | 0   | 0   | 0   | 0   | 0   | 0   | 0   | 0   | 0   |
| Protein FAM3C                                                        | Q92520 | FAM3C_HUMAN | 2   | 2   | 0   | 0   | 2   | 1   | 2   |     |     |     |     |     |     |     |     |     |     |     |     |     |     |     |     |     |     |     |     |     |
